# Supplementary material for: Capsicum baccatum Red Pepper Prevents Cardiometabolic Risk in Rats Fed with an Ultra-Processed Diet
Source: MDPI journal article supplement (doi:10.3390/metabo13030385), 2023-03-05

## Supplementary data

**Figure S1** – Animals appeared at the end of the experimental period. No clinical signs of toxicity, including hair loss, piloerection, changes in skin, eyes, or oral mucosa, nor death were observed. SD: control group (standard diet); SD+BUT: standard diet + 200 mg/kg of *C. baccatum* BUT extract; HP: ultra-processed highly palatable diet group (HP); HP+BUT: HP diet + 200 mg/kg of *C. baccatum* BUT extract.

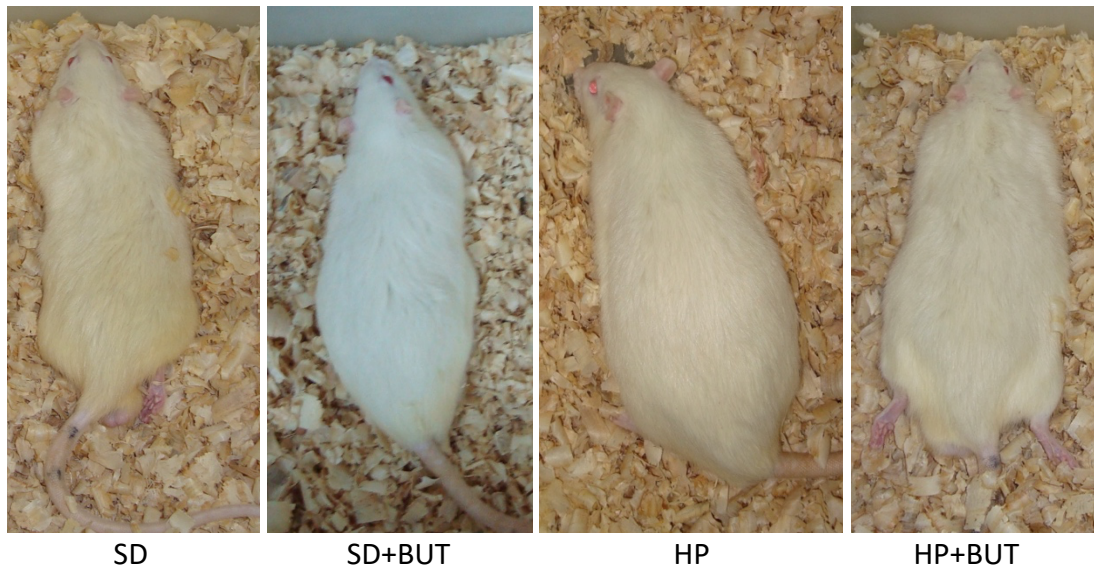

**Figure S2** - Elevated plus-maze task: Representative occupancy plots obtained by video-tracking software (ANY-maze®, Stoelting CO, USA) for experimental groups after 130 days of oral administration of *C. baccatum* BUT extract (200 mg/kg) with different diets. SD: control group (standard diet); SD+BUT: standard diet + 200 mg/kg of *C. baccatum* BUT extract; HP: ultra-processed highly palatable diet group (HP); HP+BUT: HP diet + 200 mg/kg of *C. baccatum* BUT extract.

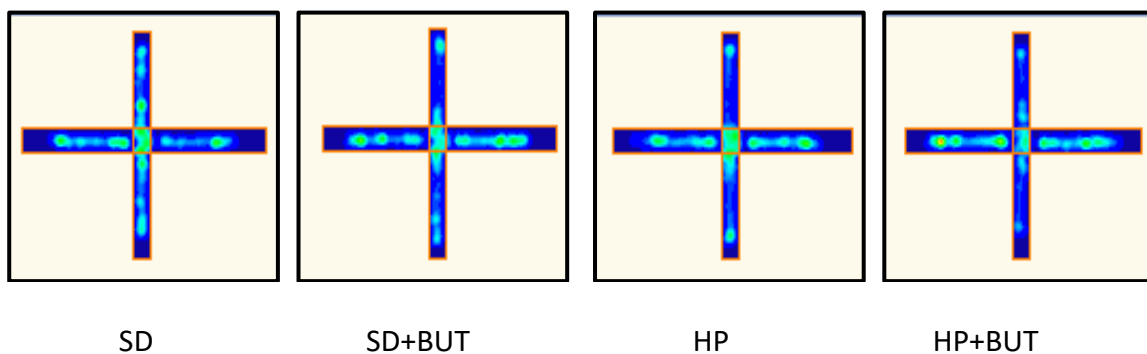

Supplement: s1 [file s1]
